# Supplementary material for: Theoretical investigation of the conformation, acidity, basicity and hydrogen bonding ability of halogenated ethers
Source: Royal Society of Chemistry journal article supplement (doi:10.1039/c0cp00192a), 2010-01-01
Supplement: c0cp00192a.pdf [file c0cp00192a.pdf]

# **Theoretical investigation of the conformation, acidity, basicity and hydrogen bond ability of halogenated ethers**

**Wiktor Zierkiewicz<sup>\*a</sup>, Danuta Michalska<sup>a</sup>, and Thérèse Zeegers-Huyskens<sup>\*b</sup>**

*<sup>a</sup> Faculty of Chemistry, Wrocław University of Technology, Wybrzeże Wyspiańskiego 27, 50-  
370 Wrocław, Poland*

*<sup>b</sup> Department of Chemistry, University of Leuven, 200F Celestijnenlaan, 3001, Heverlee,  
Belgium*

\*Corresponding authors, e-mail: [Therese.Zeegers@chem.kuleuven.be](mailto:Therese.Zeegers@chem.kuleuven.be);

[Wiktor.Zierkiewicz@pwr.wroc.pl](mailto:Wiktor.Zierkiewicz@pwr.wroc.pl)

TABLE 1S Selected NBO parameters in isolated halogenated ethers ( $\sigma^*$  occupancies and s-orbital character at C carbon in CH bond). Results of MP2/6-311++G(d,p) calculations.

|                                     | I     | II    | III   | IV    | V     |
|-------------------------------------|-------|-------|-------|-------|-------|
| $\sigma^*(C_1H_6)$                  | 0.008 | 0.021 | 0.020 | 0.037 | 0.035 |
| $\sigma^*(C_3H_7)$                  |       | 0.014 | -     | 0.012 | -     |
| $\sigma^*(C_3H_9)$                  | 0.008 | 0.007 | 0.020 | 0.007 | 0.036 |
| %s C <sub>1</sub> (H <sub>4</sub> ) | 25.92 | 27.38 | 27.88 | -     | -     |
| %s C <sub>1</sub> (H <sub>6</sub> ) | 25.64 | 27.02 | 27.08 | 27.76 | 28.89 |
| %s C <sub>3</sub> (H <sub>7</sub> ) | 25.92 | 25.99 | -     | 26.66 | -     |
| %s C <sub>3</sub> (H <sub>9</sub> ) | 25.64 | 25.81 | 27.08 | 25.79 | 30.08 |

TABLE 2S  $E^{(2)}$  energies (kcal mol<sup>-1</sup>) from lone pair of O to the  $\sigma^*$  orbitals in the protonated ethers. The numbers in parentheses indicate the differences between the protonated and isolated molecules. Results of MP2/6-311++G(d,p) calculations.

|                     | I(H <sup>+</sup> ) | II(H <sup>+</sup> ) | III(H <sup>+</sup> ) | IV(H <sup>+</sup> ) | V(H <sup>+</sup> ) |
|---------------------|--------------------|---------------------|----------------------|---------------------|--------------------|
| LP(1)O →            |                    |                     |                      |                     |                    |
| $\sigma^*(C_1H_4)$  | 1.45(+0.47)        | 0.96(-2.66)         | 2.64(+1.03)          | -                   | -                  |
| $\sigma^*(C_1H_6)$  | 0.91(-2.40)        | 1.41(-2.20)         | 0.59(-3.33)          | 1.24(-3.97)         | 0.00               |
| $\sigma^*(C_3H_7)$  | 1.46(+0.48)        | 1.28(-0.90)         | -                    | 1.71(+0.95)         | -                  |
| $\sigma^*(C_3H_8)$  | 3.27(+2.28)        | 3.01(+3.01)         | 0.99(-0.62)          | 2.89(+2.13)         | -                  |
| $\sigma^*(C_3H_9)$  | 0.91(-2.40)        | 0.91(-2.08)         | 1.23(-2.58)          | -                   | 0.00               |
| $\sigma^*(C_1X)^a$  | -                  | 6.38(+5.72)         | 1.48(-0.80)          | 5.85(+1.42)         | 1.30 (-2.17)       |
| $\sigma^*(C_3Cl_7)$ | -                  | -                   | 6.13(+3.85)          | -                   | -                  |
| $\sigma^*(C_1F_5)$  | -                  | -                   | -                    | -                   | 5.63(+2.95)        |

<sup>a</sup> X=Cl<sub>5</sub> for II, III and IV, X=Cl<sub>4</sub> for V

Table 3S Selected NBO parameters in O-protonated halogenated ethers ( $\sigma^*$  occupancies and % s-character at C carbon in CH bond). Results of MP2/6-311++G(d,p) calculations.

|                                    | I(H <sup>+</sup> ) | II(H <sup>+</sup> ) | III(H <sup>+</sup> ) | IV(H <sup>+</sup> ) | V(H <sup>+</sup> ) |
|------------------------------------|--------------------|---------------------|----------------------|---------------------|--------------------|
| $\sigma^*(C_1H_4)$                 | 0.004              | 0.021               | 0.022                | -                   | -                  |
| $\sigma^*(C_1Cl_4)$                | -                  | -                   | -                    | 0.035               | 0.031              |
| $\sigma^*(C_1Cl_5)$                | -                  | 0.015               | 0.008                | 0.043               | 0.051 <sup>a</sup> |
| $\sigma^*(C_1H_6)$                 | 0.003              | 0.019               | 0.019                | 0.040               | 0.036              |
| $\sigma^*(C_3H_7)$                 | 0.004              | 0.004               | -                    | 0.003               | 0.039 <sup>b</sup> |
| $\sigma^*(C_3H_9)$                 | 0.003              | 0.003               | 0.019                | 0.004               | 0.034              |
| %sC <sub>1</sub> (H <sub>4</sub> ) | 27.43              | 28.32               | 28.32                | -                   | -                  |
| %sC <sub>1</sub> (H <sub>6</sub> ) | 27.41              | 28.41               | 28.96                | 28.92               | 30.46              |
| %sC <sub>3</sub> (H <sub>7</sub> ) | 27.44              | 27.42               | -                    | 28.13               | -                  |
| %sC <sub>3</sub> (H <sub>9</sub> ) | 27.41              | 27.42               | 28.40                | 27.93               | 32.43              |

<sup>a</sup> Corresponds to  $\sigma^*(C_1F_5)$ . <sup>b</sup> Corresponds to  $\sigma^*(C_3F_8)$ .

TABLE 4S The NBO charges (e) on all the atoms in the isolated ethers.  
Results of MP2/6-311++G(d,p) calculations.

| I              |        | II              |        | III             |        | IV              |        | V               |        |
|----------------|--------|-----------------|--------|-----------------|--------|-----------------|--------|-----------------|--------|
| atom           | charge | atom            | charge | atom            | charge | atom            | charge | atom            | charge |
| C <sub>1</sub> | -0.095 | C <sub>1</sub>  | 0.103  | C <sub>1</sub>  | 0.078  | C <sub>1</sub>  | 0.206  | C <sub>1</sub>  | 0.614  |
| O <sub>2</sub> | -0.649 | O <sub>2</sub>  | -0.636 | O <sub>2</sub>  | -0.634 | O <sub>2</sub>  | -0.640 | O <sub>2</sub>  | -0.632 |
| C <sub>3</sub> | -0.095 | C <sub>3</sub>  | -0.108 | C <sub>3</sub>  | 0.078  | C <sub>3</sub>  | -0.120 | C <sub>3</sub>  | 0.995  |
| H <sub>4</sub> | 0.131  | H <sub>4</sub>  | 0.145  | H <sub>4</sub>  | 0.170  | Cl <sub>4</sub> | -0.060 | Cl <sub>4</sub> | -0.064 |
| H <sub>5</sub> | 0.131  | Cl <sub>5</sub> | -0.134 | Cl <sub>5</sub> | -0.110 | Cl <sub>5</sub> | -0.060 | F <sub>5</sub>  | -0.408 |
| H <sub>6</sub> | 0.158  | H <sub>6</sub>  | 0.172  | H <sub>6</sub>  | 0.179  | H <sub>6</sub>  | 0.183  | H <sub>6</sub>  | 0.163  |
| H <sub>7</sub> | 0.131  | H <sub>7</sub>  | 0.137  | Cl <sub>7</sub> | -0.110 | H <sub>7</sub>  | 0.161  | F <sub>7</sub>  | -0.393 |
| H <sub>8</sub> | 0.131  | H <sub>8</sub>  | 0.157  | H <sub>8</sub>  | 0.170  | H <sub>8</sub>  | 0.161  | F <sub>8</sub>  | -0.397 |
| H <sub>9</sub> | 0.158  | H <sub>9</sub>  | 0.165  | H <sub>9</sub>  | 0.179  | H <sub>9</sub>  | 0.170  | H <sub>9</sub>  | 0.122  |

TABLE 5S E<sup>(2)</sup> energies (kcal mol<sup>-1</sup>) from two lone pairs of O to the σ\* orbitals in the isolated molecules. Results of B3LYP/6-311++G(d,p) calculations.

|                                     | I    | II    | III   | IV    | V                  |
|-------------------------------------|------|-------|-------|-------|--------------------|
| LP(1)O →                            |      |       |       |       |                    |
| σ*(C <sub>1</sub> H <sub>4</sub> )  | 0.78 | 3.14  | 1.50  | -     | -                  |
| σ*(C <sub>1</sub> H <sub>6</sub> )  | 2.49 | 2.75  | 2.98  | 3.81  | 3.21               |
| σ*(C <sub>3</sub> H <sub>7</sub> )  | 0.78 | 1.65  | -     | 0.57  | -                  |
| σ*(C <sub>3</sub> H <sub>8</sub> )  | 0.78 | 0.00  | 1.50  | 0.57  | -                  |
| σ*(C <sub>3</sub> H <sub>9</sub> )  | 2.49 | 2.31  | 2.98  | 2.50  | 2.92               |
| σ*(C <sub>1</sub> Cl <sub>5</sub> ) | -    | 0.58  | 1.87  | 3.99  | 2.83 <sup>a</sup>  |
| σ*(C <sub>1</sub> F <sub>5</sub> )  | -    | -     | -     | -     | 2.52               |
| σ*(C <sub>3</sub> F <sub>7</sub> )  | -    | -     | -     | -     | 2.97               |
| LP(2)O →                            |      |       |       |       |                    |
| σ*(C <sub>1</sub> H <sub>4</sub> )  | 6.51 | 3.88  | 4.72  | -     | -                  |
| σ*(C <sub>1</sub> H <sub>6</sub> )  | 0.00 | 0.64  | 0.00  | 0.00  | 0.00               |
| σ*(C <sub>3</sub> H <sub>8</sub> )  | 6.51 | 6.07  | 4.72  | 4.79  | -                  |
| σ*(C <sub>1</sub> Cl <sub>5</sub> ) | -    | 21.95 | 15.50 | 16.49 | 13.72 <sup>b</sup> |
| σ*(C <sub>1</sub> F <sub>5</sub> )  | -    | -     | -     | -     | 12.61              |
| σ*(C <sub>3</sub> F <sub>7</sub> )  | -    | -     | -     | -     | 6.72               |

<sup>a</sup> E<sup>(2)</sup> from LP(1)O to σ\*(C<sub>1</sub>Cl<sub>4</sub>). <sup>b</sup> E<sup>(2)</sup> from LP(2)O to σ\*(C<sub>1</sub>Cl<sub>4</sub>).
